# Supplementary material
Source: Springer Nature journal article supplement (https://www.springermedizin.de/resource/supplementary/13075_2010_3223_MOESM3_ESM.pdf/9693950)

Panel A: Median Total Neutrophils Over Time

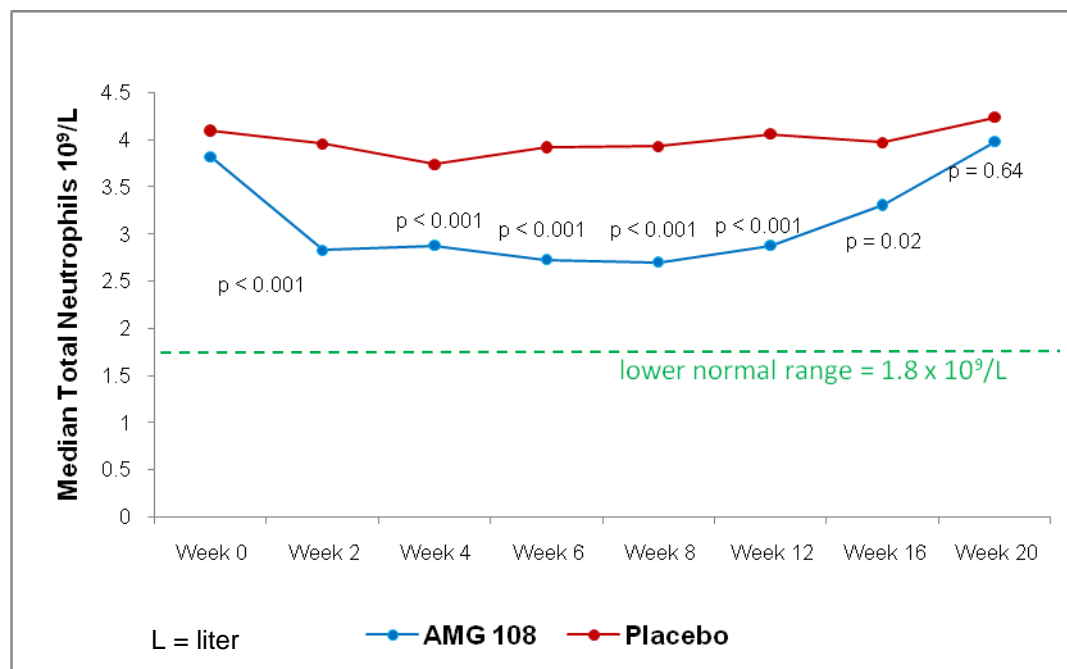

Panel B: Median C-Reactive Protein Levels Over Time

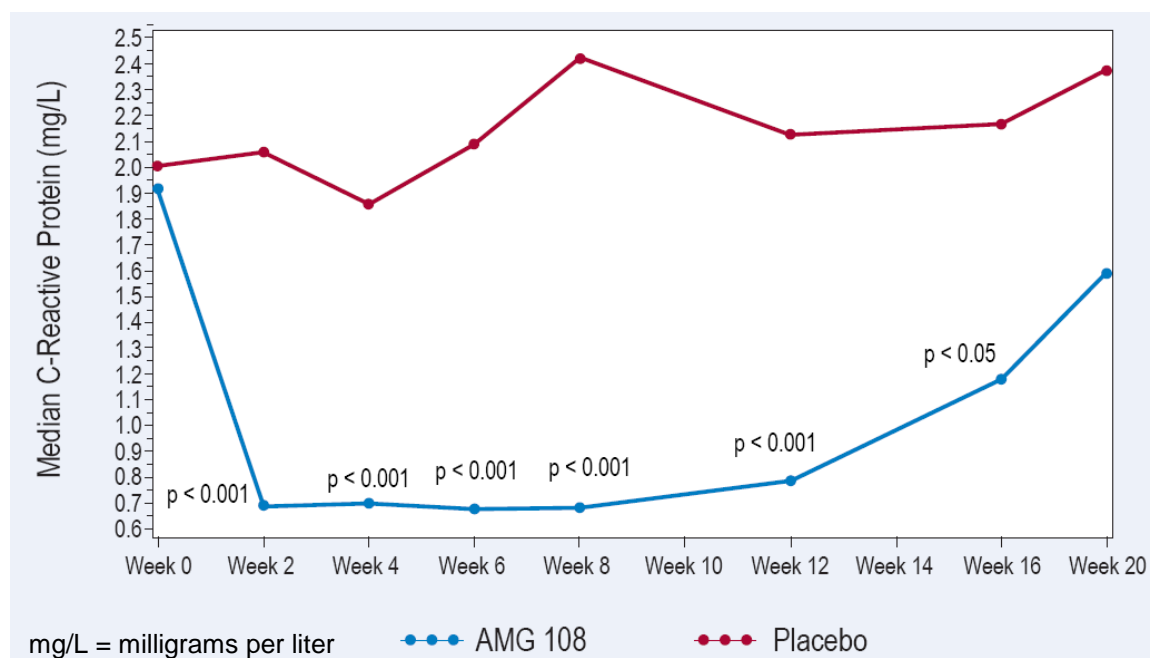

Supplement: MOESM3 [file 9693950]
